# Supplementary material for: Evaluation of the nation-wide implementation of ALS home monitoring & coaching: an e-health innovation for personalized care for patients with motor neuron disease
Source: Springer Nature journal article supplement (doi:10.1186/s12913-022-08724-6), 2022-11-22

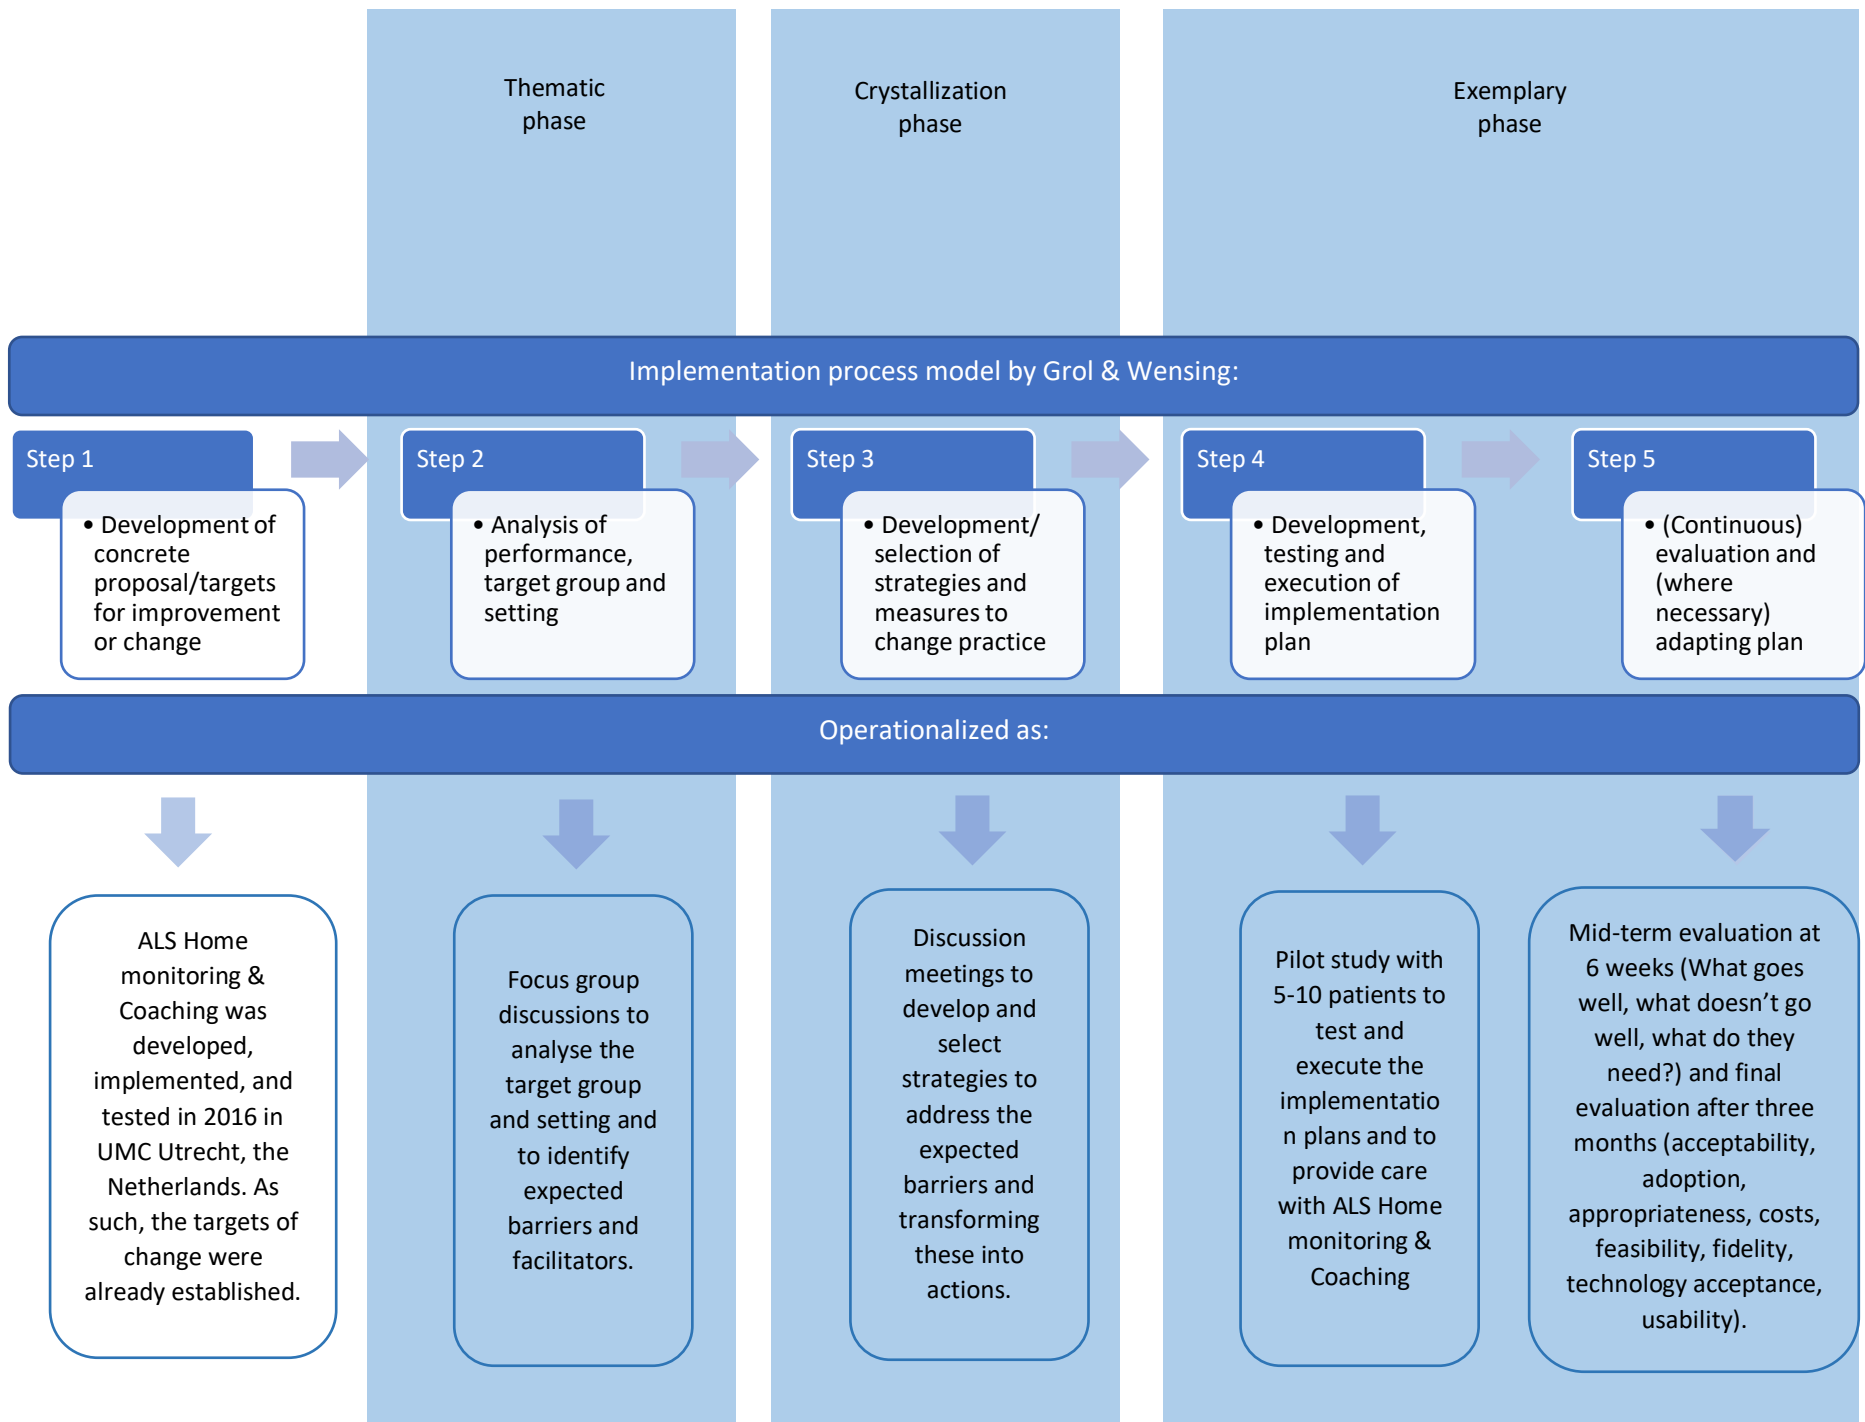

Supplement: MOESM1 [file 23745790]
